# Supplementary material for: Health systems research in fragile and conflict-affected states: a research agenda-setting exercise
Source: Health Res Policy Syst. 2016 Jul 21;14:51. doi: 10.1186/s12961-016-0124-1 (PMC4955129; doi:10.1186/s12961-016-0124-1)
Supplement: Additional file 1: — Scoping review. This document shows the search strategy used for OVIDSP database searches, list of journals and organisations that were hand-searched via their websites, a flow diagram, and the list of records included in the review. (PDF 141 kb) [file 12961_2016_124_MOESM1_ESM.pdf]

## Scoping Review

### Search strategy used for OVIDSP database searches

| Set | Search Statement                                                                                                                                                                                                                         |
|-----|------------------------------------------------------------------------------------------------------------------------------------------------------------------------------------------------------------------------------------------|
| 1.  | ((research or information) adj (agenda* or need* or priority or priorities or problem* or concern* or gap*)).mp.                                                                                                                         |
| 2.  | research priority setting/ or health priorit*/ or needs assessment.mp.                                                                                                                                                                   |
| 3.  | 1 or 2                                                                                                                                                                                                                                   |
| 4.  | ((health) adj (system* or service* or care or delivery or workforce or financing or information system or governance or leadership)).mp.                                                                                                 |
| 5.  | exp Health/ or exp Health care/ or exp Health services/ or exp Health programs/ or exp Health policy/ or exp Health care costs/ or exp Health care workers/ or exp Health care utilization/ or exp Health centres/ or exp Health clinics |
| 6.  | 4 or 5                                                                                                                                                                                                                                   |
| 7.  | exp War/ or exp Emergency relief/ or exp Emergencies                                                                                                                                                                                     |
| 8.  | post-conflict/ or postconflict /or conflict-affected/or conflict affected /or conflict-ridden/ or protracted/ or wartorn/ or war*/ or fighting/ or insurgen*.mp.                                                                         |
| 9.  | statebuilding/ or state-building/ or peace-building/ or peacebuilding/ or peacekeeping/ or health system strengthening/ or post-conflict reconstruction/ or postconflict reconstruction.mp.                                              |
| 10. | ((fragile or unstable or fragility) adj (nation* or state* or country or countries or situation* or context* or setting* or region*)).mp.                                                                                                |
| 11. | 7 or 8 or 9 or 10                                                                                                                                                                                                                        |
| 12. | 3 and 6 and 11                                                                                                                                                                                                                           |

## List of journals and organisations that were hand-searched via their websites

| <b>Journals</b>                            | <b>Organisations</b>                 |
|--------------------------------------------|--------------------------------------|
| The Lancet & The Lancet Global Health      | Alliance-HSPR                        |
| Conflict & Health                          | Health and Fragile States Network    |
| Disasters                                  | ReBUILD Consortium                   |
| Health Systems & Policy Research           | WHO                                  |
| Health Policy & Planning                   | WHO Global Health Workforce Alliance |
| Social Science & Medicine                  | OECD-INCAF                           |
| Medicine Conflict & Survival               | Health Systems 20/20                 |
| Development in Practice                    | World Bank HIVE                      |
| European Journal of Public Health          | McMaster Health System Evidence      |
| PLoS Medicine                              | Google advanced search engine        |
| Development Policy Review                  | ELRHA                                |
| International Journal for Equity in Health |                                      |
| WHO Bulletin                               |                                      |
| Global Health Governance                   |                                      |

## Flow diagram

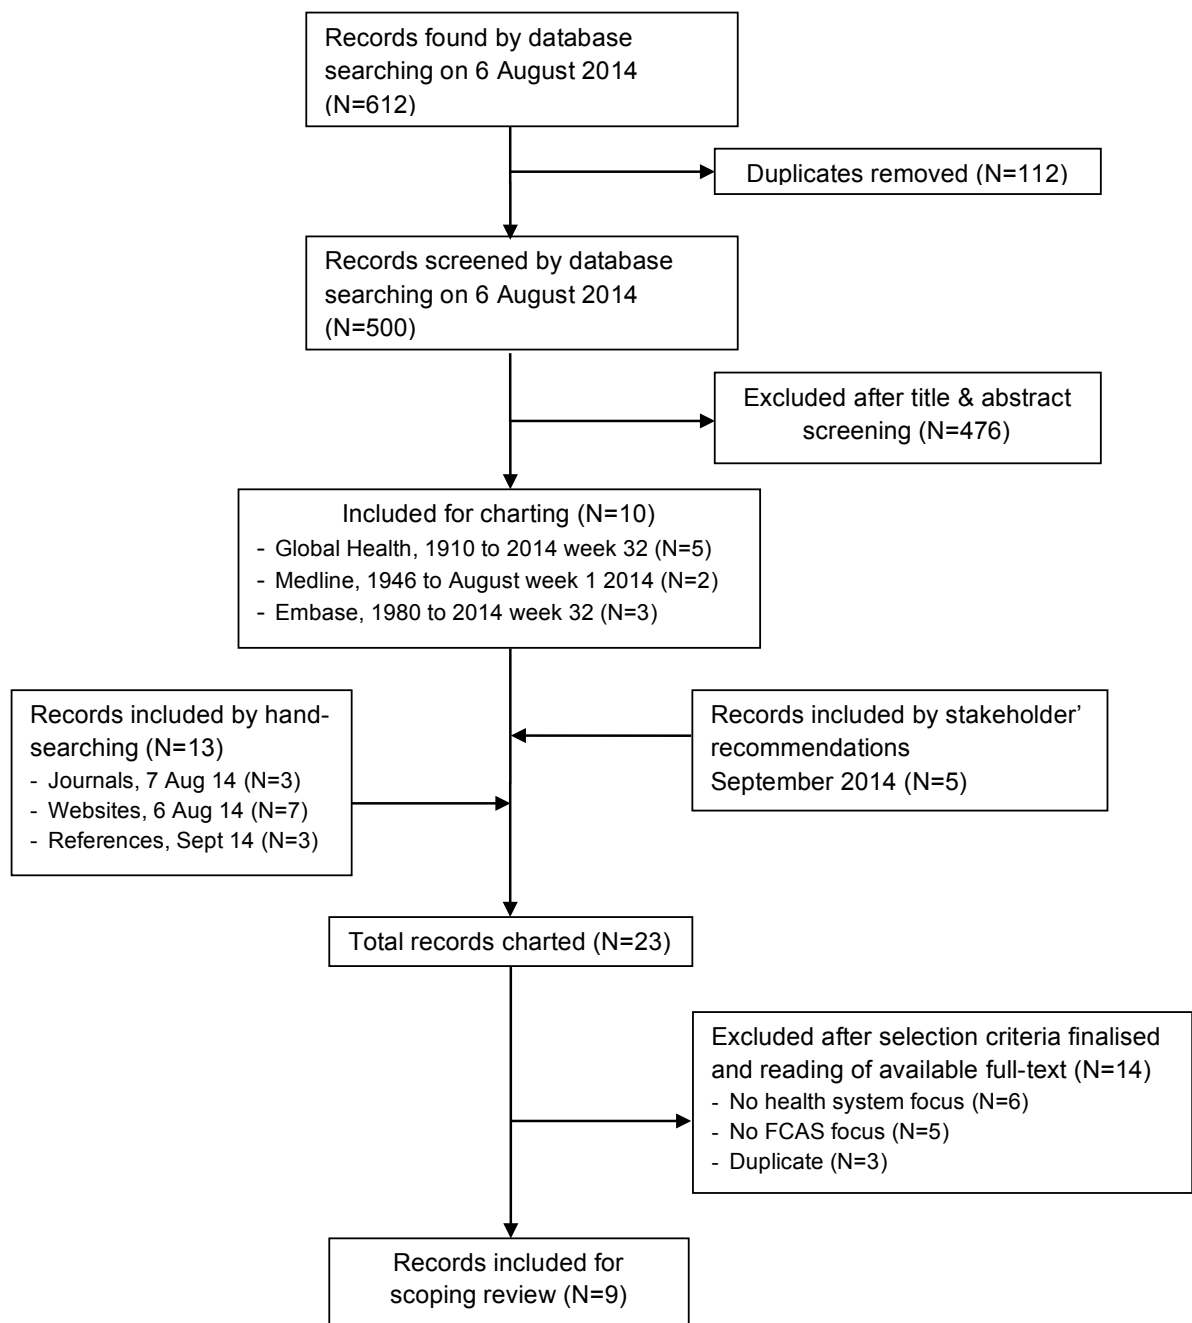

## Records included in scoping review

|   | Lead Author                                     | Year of publication | Title of article or report                                                                                                                                                                    | Type of source  |
|---|-------------------------------------------------|---------------------|-----------------------------------------------------------------------------------------------------------------------------------------------------------------------------------------------|-----------------|
| 1 | Kruk                                            | 2010                | Rebuilding health systems to improve health and promote statebuilding in post-conflict countries: a theoretical framework and research agenda.                                                | Journal article |
| 2 | Evidence Aid Priority Setting Group             | 2013                | Prioritization of Themes and Research Questions for Health Outcomes in Natural Disasters, Humanitarian Crises or Other Major Healthcare Emergencies.                                          | Journal article |
| 3 | Haar                                            | 2012                | Health in fragile and post-conflict states: a review of current understanding and challenges ahead.                                                                                           | Journal article |
| 4 | Witter                                          | 2012                | Health financing in fragile and post-conflict states: What do we know and what are the gaps?                                                                                                  | Journal article |
| 5 | Tulloch                                         | 2011                | HUMAN RESOURCES FOR HEALTH IN POST-CONFLICT SETTINGS                                                                                                                                          | Report          |
| 6 | Blanchet                                        | 2013                | An evidence review of research on health interventions in humanitarian crises.                                                                                                                | Report          |
| 7 | Eldon                                           | 2008                | Health Systems Reconstruction and State-building                                                                                                                                              | Report          |
| 8 | Alliance for Health Policy and Systems Research | 2008                | Neglected Health Systems Research: Health Policy and Systems Research in Conflict-Affected Fragile States                                                                                     | Report          |
| 9 | Ranson                                          | 2007                | Promoting health equity in conflict-affected fragile states. Prepared for the Health Systems Knowledge Network of the World Health Organisation's Commission on Social Determinants of Health | Report          |
